# Supplementary material for: Synthesis and in vitro biochemical evaluation of oxime bond-linked daunorubicin–GnRH-III conjugates developed for targeted drug delivery
Source: PubMed Central journal article supplement (PMC5905287; doi:10.3762/bjoc.14.64), 2018-04-04
Supplement: Beilstein_J_Org_Chem-14-756-s001.pdf [file Beilstein_J_Org_Chem-14-756-s001.pdf]

**Supporting Information**  
**for**  
**Synthesis and in vitro biochemical evaluation of oxime bond  
linked daunorubicin–GnRH-III conjugates developed for  
targeted drug delivery**

Sabine Schuster<sup>1,2</sup>, Beáta Biri-Kovács<sup>1,2</sup>, Bálint Szeder<sup>3</sup>, Viktor Farkas<sup>4</sup>, László Buday<sup>3</sup>, Zsuzsanna Szabó<sup>5</sup>, Gábor Halmos<sup>5</sup> and Gábor Mező<sup>1,2\*</sup>

Address: <sup>1</sup>MTA-ELTE Research Group of Peptide Chemistry, Hungarian Academy of Sciences, Eötvös L. University, 1117 Budapest, Hungary, <sup>2</sup>Institute of Chemistry, Eötvös L. University, 1117 Budapest, Hungary, <sup>3</sup>Research Centre for Natural Sciences, Institute of Enzymology, Hungarian Academy of Sciences, 1117 Budapest, Hungary, <sup>4</sup>MTA-ELTE Protein Modelling Research Group, Hungarian Academy of Sciences, Eötvös L. University, 1117 Budapest, Hungary and <sup>5</sup>Department of Biopharmacy, Faculty of Pharmacy, University of Debrecen, 4032 Debrecen, Hungary

Email: Gábor Mező - gmezo@elte.hu

\*Corresponding author

**Characterization data for compounds 1–6: RP-HPLC chromatograms and ESI–  
MS spectra; fragments of 1–6 produced by lysosomal rat liver homogenate;  
cellular uptake of K1, K2, 1, 2, 4, 5 by CLSM**

## Table of contents

|                                                                                                                                                                                                |     |
|------------------------------------------------------------------------------------------------------------------------------------------------------------------------------------------------|-----|
| RP-HPLC profile and ESI-ion trap mass spectrum of GnRH-III-[ <sup>4</sup> Ser, <sup>8</sup> Lys(Dau=Aoa)] ( <b>K1</b> )                                                                        | S3  |
| RP-HPLC profile and ESI-ion trap mass spectrum of GnRH-III-[ <sup>4</sup> Lys(Bu), <sup>8</sup> Lys(Dau=Aoa)] ( <b>K2</b> )                                                                    | S3  |
| RP-HPLC profile and ESI-ion trap mass spectrum of GnRH-III-[ <sup>4</sup> Ser, <sup>6</sup> D-Asp, <sup>8</sup> Lys(Dau=Aoa)] ( <b>1</b> )                                                     | S4  |
| RP-HPLC profile and ESI-ion trap mass spectrum of GnRH-III-[ <sup>4</sup> Ser, <sup>6</sup> D-Glu, <sup>8</sup> Lys(Dau=Aoa)] ( <b>2</b> )                                                     | S4  |
| RP-HPLC profile and ESI-ion trap mass spectrum of GnRH-III-[ <sup>4</sup> Ser, <sup>6</sup> D-Trp, <sup>8</sup> Lys(Dau=Aoa)] ( <b>3</b> )                                                     | S4  |
| RP-HPLC profile and ESI-ion trap mass spectrum of GnRH-III-[ <sup>4</sup> Lys(Bu), <sup>6</sup> D-Asp, <sup>8</sup> Lys(Dau=Aoa)] ( <b>4</b> )                                                 | S5  |
| RP-HPLC profile and ESI-ion trap mass spectrum of GnRH-III-[ <sup>4</sup> Lys(Bu), <sup>6</sup> D-Glu, <sup>8</sup> Lys(Dau=Aoa)] ( <b>5</b> )                                                 | S5  |
| RP-HPLC profile and ESI-ion trap mass spectrum of GnRH-III-[ <sup>4</sup> Lys(Bu), <sup>6</sup> D-Trp, <sup>8</sup> Lys(Dau=Aoa)] ( <b>6</b> )                                                 | S5  |
| Fragments produced by the cleavage of GnRH-III-[ <sup>4</sup> Lys(Bu)/ <sup>4</sup> Ser, <sup>6</sup> Aaa, <sup>8</sup> Lys(Dau=Aoa)]<br>bioconjugates in the presence of rat liver homogenate | S6  |
| Cellular uptake of <b>K1</b> by confocal laser scanning microscopy                                                                                                                             | S8  |
| Cellular uptake of <b>1</b> by confocal laser scanning microscopy                                                                                                                              | S9  |
| Cellular uptake of <b>2</b> by confocal laser scanning microscopy                                                                                                                              | S10 |
| Cellular uptake of <b>K2</b> by confocal laser scanning microscopy                                                                                                                             | S11 |
| Cellular uptake of <b>4</b> by confocal laser scanning microscopy                                                                                                                              | S12 |
| Cellular uptake of <b>5</b> by confocal laser scanning microscopy                                                                                                                              | S13 |
| Electronic circular dichroism spectra of bioconjugates                                                                                                                                         | S14 |

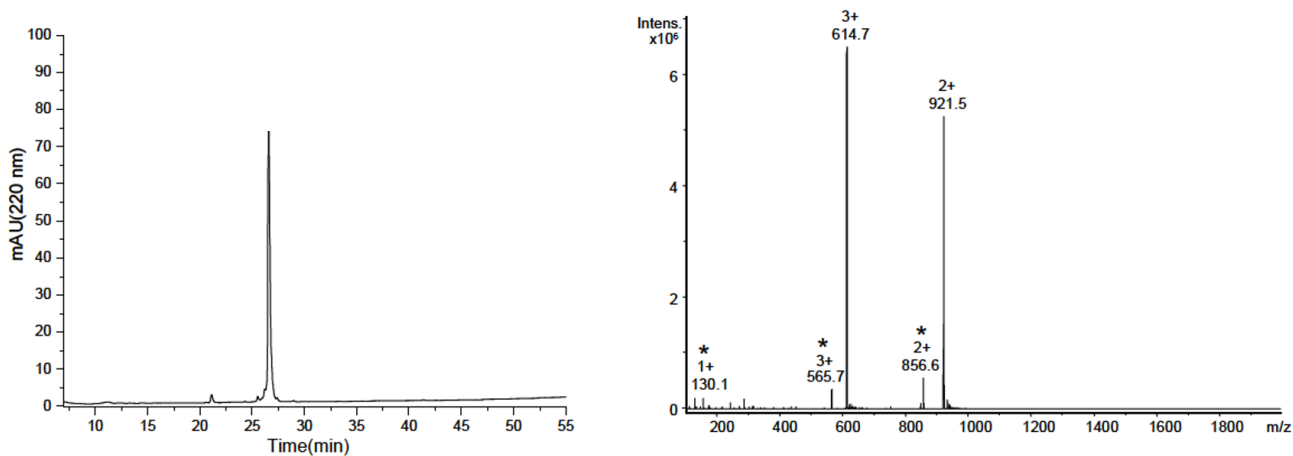

**Figure S1.** RP-HPLC profile and ESI-ion trap mass spectrum of GnRH-III-[<sup>4</sup>Ser, <sup>8</sup>Lys(Dau=Aoa)] (**K1**). (MW<sub>cal</sub>/MW<sub>exp</sub> = 1841.89/1841.05 g/mol, \*fragment ion: amino sugar loss of Dau)

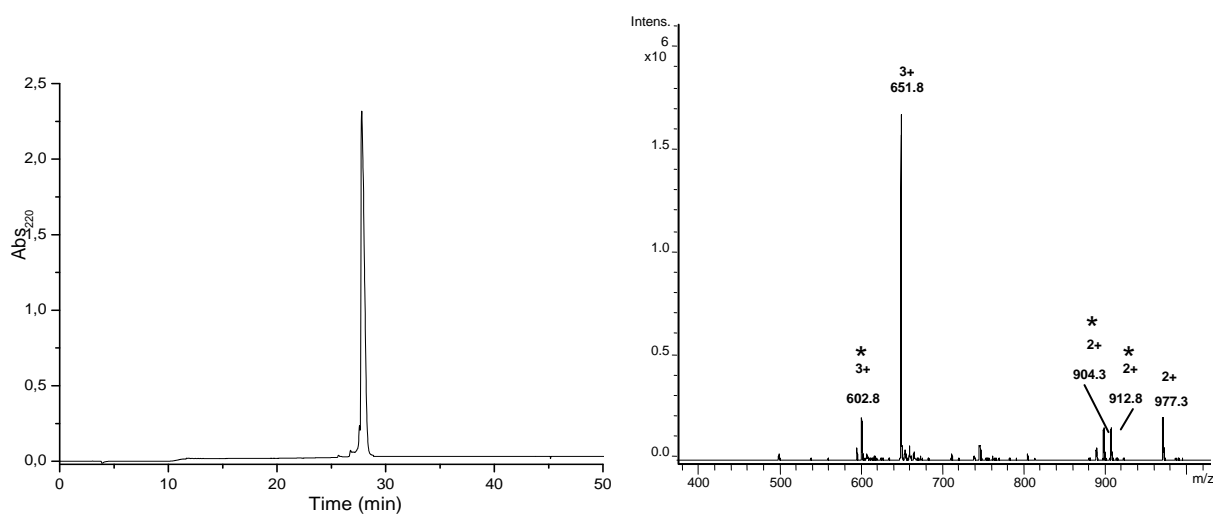

**Figure S2.** RP-HPLC profile and ESI-ion trap mass spectrum of GnRH-III-[<sup>4</sup>Lys(Bu), <sup>8</sup>Lys(Dau=Aoa)] (**K2**). (MW<sub>cal</sub>/MW<sub>exp</sub> = 1953.07/1952.70 g/mol).

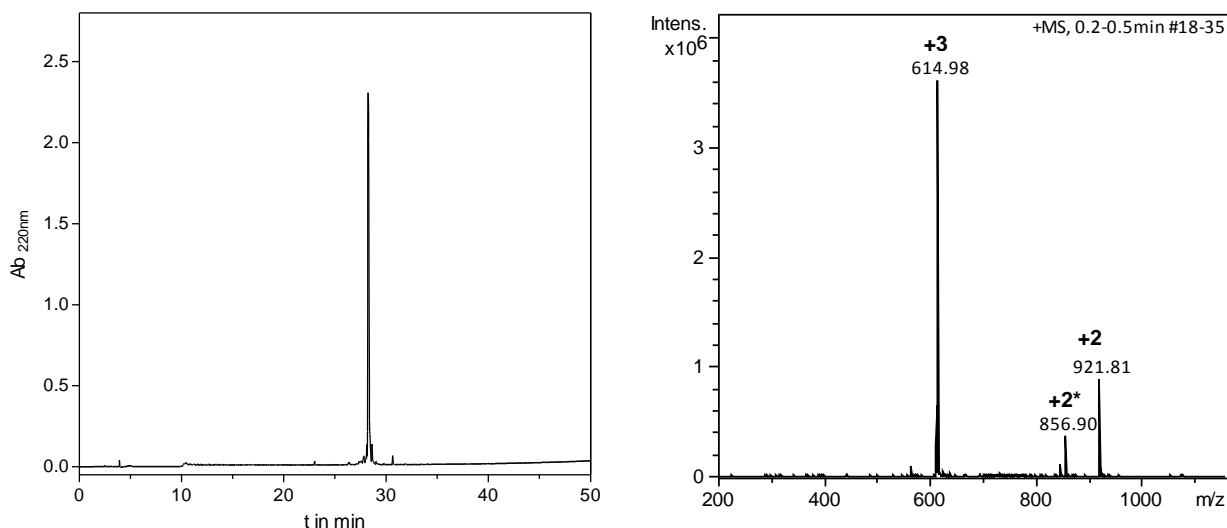

**Figure S3.** RP-HPLC profile and ESI-ion trap mass spectrum of GnRH-III-[<sup>4</sup>Ser, <sup>6</sup>D-Asp, <sup>8</sup>Lys(Dau=Aoa)]  
**(1)** ( $MW_{cal}/MW_{exp} = 1841.89/1841.60$  g/mol, \*fragment ion: amino sugar loss of Dau)

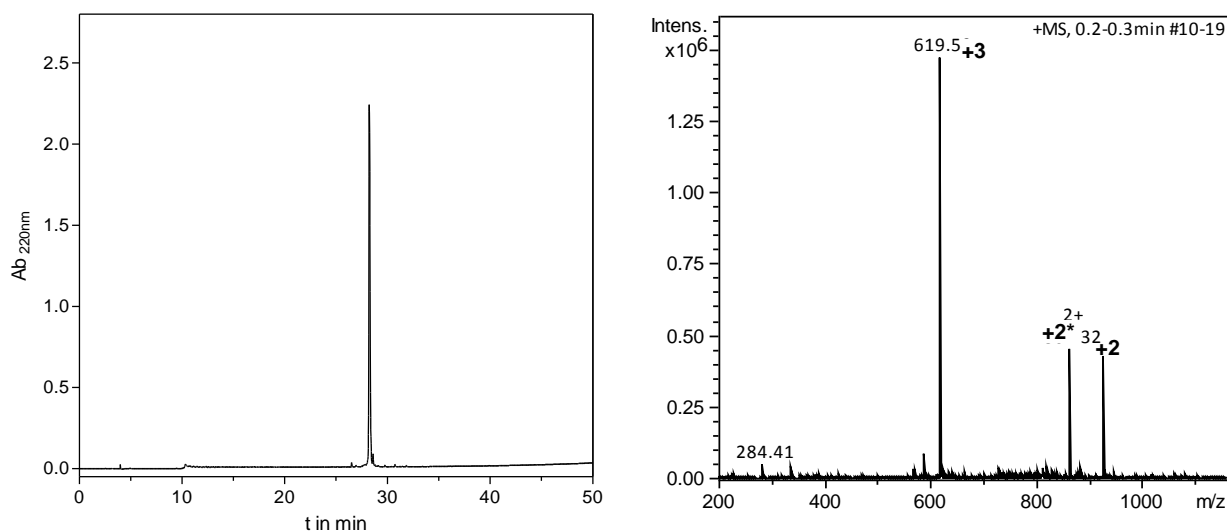

**Figure S4.** RP-HPLC profile and ESI-ion trap mass spectrum of GnRH-III-[<sup>4</sup>Ser, <sup>6</sup>D-Glu, <sup>8</sup>Lys(Dau=Aoa)]  
**(2)** ( $MW_{cal}/MW_{exp} = 1855.91/1855.70$  g/mol)

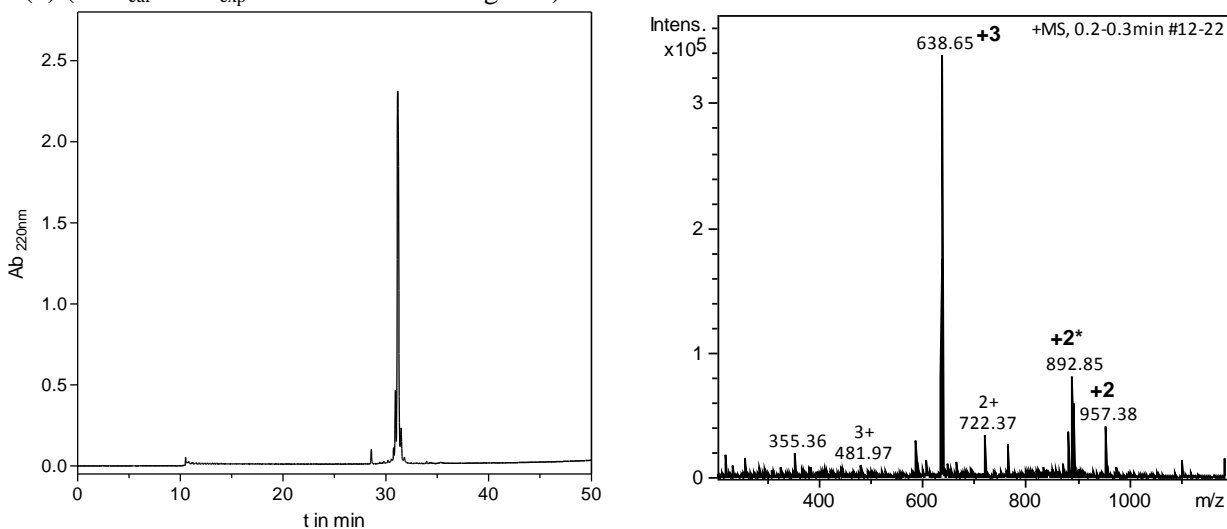

**Figure S5.** RP-HPLC profile and ESI-ion trap mass spectrum of GnRH-III-[<sup>4</sup>Ser, <sup>6</sup>D-Trp, <sup>8</sup>Lys(Dau=Aoa)]  
**(3)** ( $MW_{cal}/MW_{exp} = 1913.01/1912.80$  g/mol)

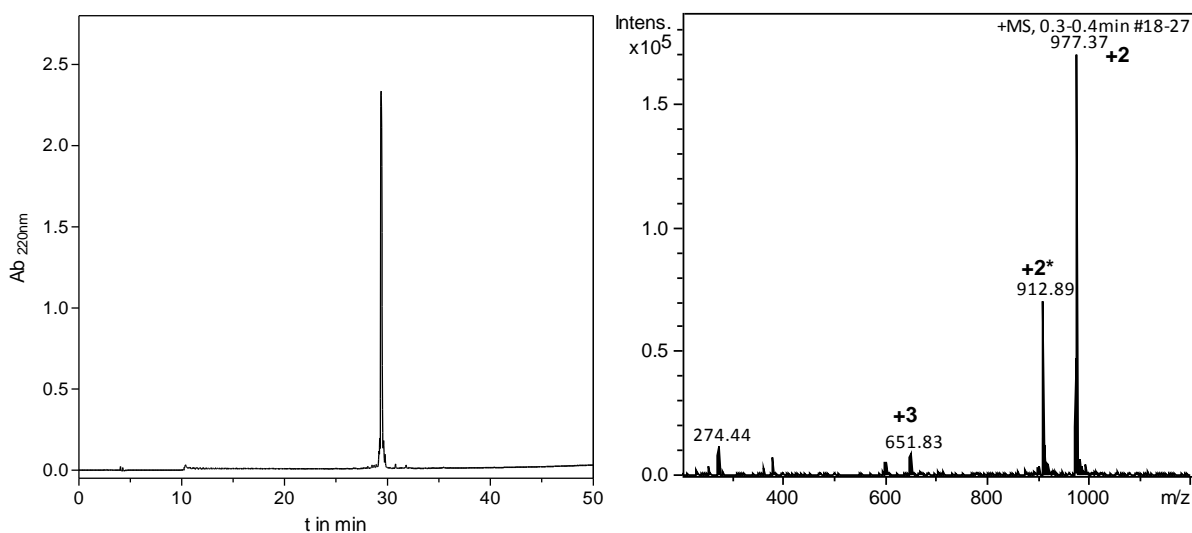

**Figure S6.** RP-HPLC profile and ESI-ion trap mass spectrum of GnRH-III-[<sup>4</sup>Lys(Bu), <sup>6</sup>D-Asp, <sup>8</sup>Lys(Dau=Aoa)] (**4**) ( $MW_{cal}/MW_{exp} = 1953.07/1952.90$  g/mol)

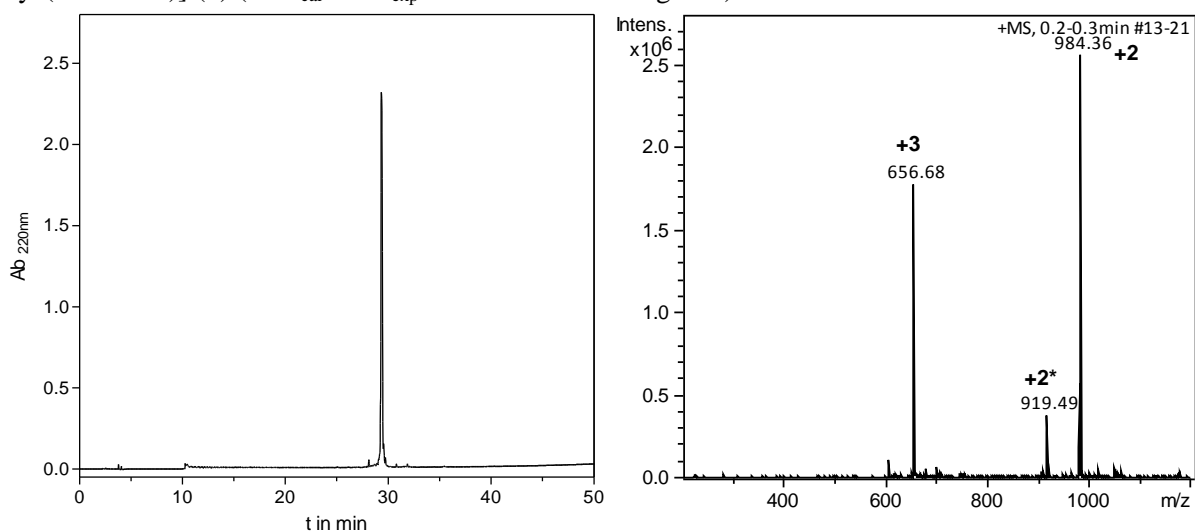

**Figure S7.** RP-HPLC profile and ESI-ion trap mass spectrum of GnRH-III-[<sup>4</sup>Lys(Bu), <sup>6</sup>D-Glu, <sup>8</sup>Lys(Dau=Aoa)] (**5**) ( $MW_{cal}/MW_{exp} = 1966.93/1966.70$  g/mol)

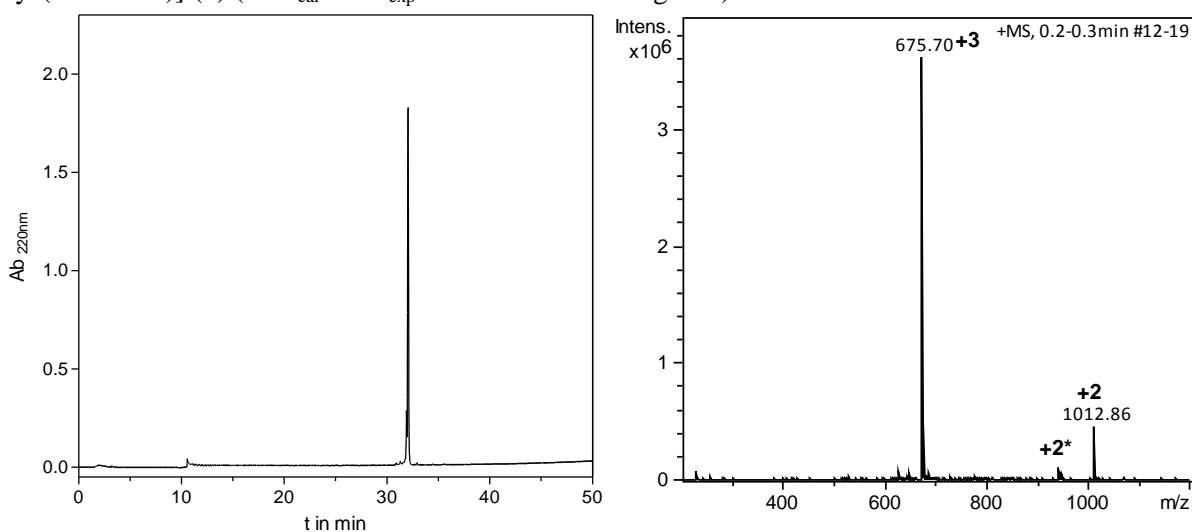

**Figure S8.** RP-HPLC profile and ESI-ion trap mass spectrum of GnRH-III-[<sup>4</sup>Lys(Bu), <sup>6</sup>D-Trp, <sup>8</sup>Lys(Dau=Aoa)] (**6**) ( $MW_{cal}/MW_{exp} = 2024.03/2023.70$ )

**Table S1.** Fragments produced by the cleavage of GnRH-III-[<sup>4</sup>Lys(Bu)/<sup>4</sup>Ser, <sup>6</sup>Aaa, <sup>8</sup>Lys(Dau=Aoa)] bioconjugates in the presence of rat liver homogenate

| Code                                   | Compound                                                               | Fragment                                 | MW <sub>cal</sub> /MW <sub>exp</sub>                                   |                                          |                 |
|----------------------------------------|------------------------------------------------------------------------|------------------------------------------|------------------------------------------------------------------------|------------------------------------------|-----------------|
| <b>K1</b>                              | [ <sup>8</sup> Lys(Dau=Aoa)]                                           | <EHWSDWK(Dau=Aoa)PG-NH <sub>2</sub>      | 1841.89/1841.66                                                        |                                          |                 |
|                                        |                                                                        | <EHWSDWK(Dau=Aoa)P-OH                    | 1785.82/1785.27                                                        |                                          |                 |
|                                        |                                                                        | <EHWSDWK(Dau=Aoa)-OH                     | 1688.70/1688.69                                                        |                                          |                 |
|                                        |                                                                        | H-WSDWK(Dau=Aoa)-OH                      | 1440.49/1439.78                                                        |                                          |                 |
|                                        |                                                                        | H-HDWK(Dau=Aoa)PG-NH <sub>2</sub>        | 1320.36/139.83                                                         |                                          |                 |
|                                        |                                                                        | H-HDWK(Dau=Aoa)-OH                       | 1167.18/1166.87                                                        |                                          |                 |
|                                        |                                                                        | H-K(Dau=Aoa)PG-NH <sub>2</sub>           | 881.94/881.39                                                          |                                          |                 |
|                                        |                                                                        | H-K(Dau=Aoa)P-OH                         | 825.86/825.35                                                          |                                          |                 |
|                                        |                                                                        | H-K(Dau=Aoa)-OH                          | 728.75/728.34                                                          |                                          |                 |
|                                        |                                                                        | <EHWSH-OH                                | 676.68/676.23                                                          |                                          |                 |
|                                        |                                                                        | <EHWS-OH                                 | 539.54/539.32                                                          |                                          |                 |
|                                        |                                                                        | <EHW-OH                                  | 452.46/452.32                                                          |                                          |                 |
|                                        |                                                                        | H-DW-OH                                  | 319.12/319.28                                                          |                                          |                 |
| <b>1</b>                               | [ <sup>6</sup> D-Asp, <sup>8</sup> Lys(Dau=Aoa)]                       | <EHWSHdWK(Dau=Aoa)PG-NH <sub>2</sub>     | 1841.89/1841.63                                                        |                                          |                 |
|                                        |                                                                        | <EHWSHdWK(Dau=Aoa)P-OH                   | 1785.82/1785.63                                                        |                                          |                 |
|                                        |                                                                        | <EHWSHdWK(Dau=Aoa)-OH                    | 1688.70/1688.44                                                        |                                          |                 |
|                                        |                                                                        | H-WSHdWK(Dau=Aoa)PG-NH <sub>2</sub>      | 1593.65/1593.61                                                        |                                          |                 |
|                                        |                                                                        | H-WSHdWK(Dau=Aoa)-OH                     | 1440.49/1440.45                                                        |                                          |                 |
|                                        |                                                                        | H-SHdWK(Dau=Aoa)-OH                      | 1254.26/1253.83                                                        |                                          |                 |
| <b>2</b>                               | [ <sup>6</sup> D-Glu, <sup>8</sup> Lys(Dau=Aoa)]                       | <EHWSHeWK(Dau=Aoa)PG-NH <sub>2</sub>     | 1855.90/1855.67                                                        |                                          |                 |
|                                        |                                                                        | <EHWSHeWK(Dau=Aoa)P-OH                   | 1799.87/1799.79                                                        |                                          |                 |
|                                        |                                                                        | <EHWSHeWK(Dau=Aoa)-OH                    | 1702.76/1701.85                                                        |                                          |                 |
|                                        |                                                                        | H-WSheWK(Dau=Aoa)PG-NH <sub>2</sub>      | 1607.70/1607.63                                                        |                                          |                 |
|                                        |                                                                        | H-WSheWK(Dau=Aoa)-OH                     | 1454.51/1453.91                                                        |                                          |                 |
|                                        |                                                                        | H-SHeWK(Dau=Aoa)-OH                      | 1268.30/1267.75                                                        |                                          |                 |
|                                        |                                                                        | H-K(Dau=Aoa)-OH                          | 728.75/728.33                                                          |                                          |                 |
| <b>3</b>                               | [ <sup>6</sup> D-Trp, <sup>8</sup> Lys(Dau=Aoa)]                       | <EHWSHwWK(Dau=Aoa)PG-NH <sub>2</sub>     | 1913.04/1912.79                                                        |                                          |                 |
|                                        |                                                                        | <EHWSHwWK(Dau=Aoa)P-OH                   | 1856.94/1856.64                                                        |                                          |                 |
|                                        |                                                                        | <EHWSHwWK(Dau=Aoa)-OH                    | 1759.85/1759.61                                                        |                                          |                 |
|                                        |                                                                        | H-WShwWK(Dau=Aoa)-OH                     | 1511.61/1511.58                                                        |                                          |                 |
|                                        |                                                                        | H-SHwWK(Dau=Aoa)PG-NH <sub>2</sub>       | 1478.58/1477.79                                                        |                                          |                 |
|                                        |                                                                        | H-SHwWK(Dau=Aoa)-OH                      | 1325.40/1324.04                                                        |                                          |                 |
|                                        |                                                                        | H-wWK(Dau=Aoa)-OH                        | 1101.18/1101.01                                                        |                                          |                 |
|                                        |                                                                        | H-K(Dau=Aoa)-OH                          | 728.75/728.34                                                          |                                          |                 |
|                                        |                                                                        | <EHWSHwW-OH                              | 1049.12/1049.06                                                        |                                          |                 |
| <b>K2</b>                              | [ <sup>4</sup> Lys(Bu), <sup>8</sup> Lys(Dau=Aoa)]                     | <EHWK(Bu)HDWK(Dau=Aoa)PG-NH <sub>2</sub> | 1953.07/1952.79                                                        |                                          |                 |
|                                        |                                                                        | <EHWK(Bu)HDWK(Dau=Aoa)-OH                | 1799.92/1799.69                                                        |                                          |                 |
|                                        |                                                                        | H-HDWK(Dau=Aoa)PG-NH <sub>2</sub>        | 1320.36/1319.95                                                        |                                          |                 |
|                                        |                                                                        | H-HDWK(Dau=Aoa)-OH                       | 1167.18/1166.91                                                        |                                          |                 |
|                                        |                                                                        | H-K(Dau=Aoa)PG-NH <sub>2</sub>           | 881.94/881.44                                                          |                                          |                 |
|                                        |                                                                        | H-K(Dau=Aoa)P-OH                         | 825.86/825.40                                                          |                                          |                 |
|                                        |                                                                        | H-K(Dau=Aoa)-OH                          | 728.75/728.37                                                          |                                          |                 |
|                                        |                                                                        | <EHWK(Bu)HD-OH                           | 902.96/902.84                                                          |                                          |                 |
|                                        |                                                                        | <EHWK(Bu)-OH                             | 650.73/650.71                                                          |                                          |                 |
|                                        |                                                                        | <EHW-OH                                  | 452.46/452.31                                                          |                                          |                 |
|                                        |                                                                        | H-DW-OH                                  | 319.32/319.27                                                          |                                          |                 |
|                                        |                                                                        | <b>4</b>                                 | [ <sup>4</sup> Lys(Bu), <sup>6</sup> D-Asp, <sup>8</sup> Lys(Dau=Aoa)] | <EHWK(Bu)HdWK(Dau=Aoa)PG-NH <sub>2</sub> | 1953.07/1952.79 |
|                                        |                                                                        |                                          |                                                                        | <EHWK(Bu)HdWK(Dau=Aoa)P-OH               | 1897.03/1896.90 |
| <EHWK(Bu)HdWK(Dau=Aoa)-OH              | 1799.92/1799.81                                                        |                                          |                                                                        |                                          |                 |
| H-WK(Bu)HdWK(Dau=Aoa)-OH               | 1551.67/1551.59                                                        |                                          |                                                                        |                                          |                 |
| H-K(Bu)HdWK(Dau=Aoa)PG-NH <sub>2</sub> | 1518.65/1517.88                                                        |                                          |                                                                        |                                          |                 |
| H-K(Bu)HdWK(Dau=Aoa)-OH                | 1365.46/1364.92                                                        |                                          |                                                                        |                                          |                 |
| H-HdWK(Dau=Aoa)-OH                     | 1167.18/1166.90                                                        |                                          |                                                                        |                                          |                 |
| <EHWK(Bu)-OH                           | 650.73/650.43                                                          |                                          |                                                                        |                                          |                 |
| <EHW-OH                                | 452.46/452.3                                                           |                                          |                                                                        |                                          |                 |
| <b>5</b>                               | [ <sup>4</sup> Lys(Bu), <sup>6</sup> D-Glu, <sup>8</sup> Lys(Dau=Aoa)] | <EHWK(Bu)HeWK(Dau=Aoa)PG-NH <sub>2</sub> | 1967.13/1966.82                                                        |                                          |                 |
|                                        |                                                                        | <EHWK(Bu)HeWK(Dau=Aoa)P-OH               | 1911.06/1910.81                                                        |                                          |                 |
|                                        |                                                                        | <EHWK(Bu)HeWK(Dau=Aoa)-OH                | 1813.94/1813.70                                                        |                                          |                 |

|   |                                                                        |                                          |                 |
|---|------------------------------------------------------------------------|------------------------------------------|-----------------|
| 5 | [ <sup>4</sup> Lys(Bu), <sup>6</sup> D-Glu, <sup>8</sup> Lys(Dau=Aoa)] | H-WK(Bu)HeWK(Dau=Aoa)-OH                 | 1565.70/1565.13 |
|   |                                                                        | H-HeWK(Dau=Aoa)-OH                       | 1181.22/1180.67 |
|   |                                                                        | H-K(Bu)HeWK(Dau=Aoa)-OH                  | 1379.49/1378.93 |
|   |                                                                        | <EHW-OH                                  | 452.46/452.31   |
| 6 | [ <sup>4</sup> Lys(Bu), <sup>6</sup> D-Trp, <sup>8</sup> Lys(Dau=Aoa)] | <EHWK(Bu)HwWK(Dau=Aoa)PG-NH <sub>2</sub> | 2024.22/2024.25 |
|   |                                                                        | <EHWK(Bu)HwWK(Dau=Aoa)P-OH               | 1968.16/1967.84 |
|   |                                                                        | <EHWK(Bu)HwWK(Dau=Aoa)-OH                | 1871.04/1870.50 |
|   |                                                                        | <EHWK(Bu)HwW-OH                          | 1160.30/1160.21 |
|   |                                                                        | H-K(Bu)HwWK(Dau=Aoa)-OH                  | 1436.59/1436.24 |
|   |                                                                        | H-HwWK(Dau=Aoa)-OH                       | 1238.32/1232.04 |
|   |                                                                        | H-K(Dau=Aoa)-OH                          | 728.75/728.33   |
|   |                                                                        | <EHWK(Bu)-OH                             | 650.73/650.43   |
|   |                                                                        | H-HwW-OH                                 | 527.58/527.37   |

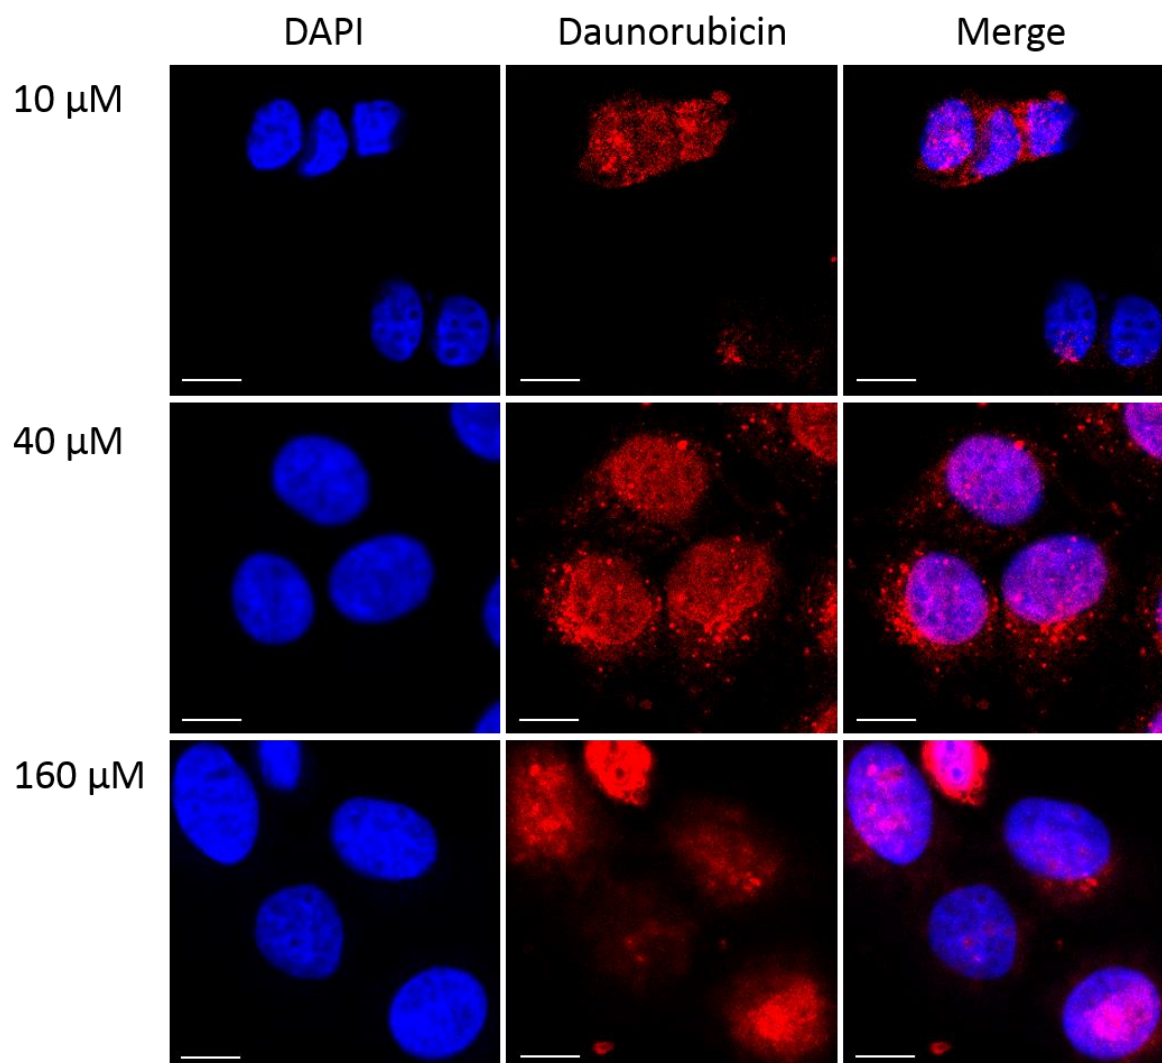

**Figure S9.** Cellular uptake of bioconjugate **K1** (10  $\mu\text{M}$ , 40  $\mu\text{M}$  and 160  $\mu\text{M}$ ) visualized by confocal laser scanning microscopy (CLSM) (scale bars represent 10  $\mu\text{m}$ ).



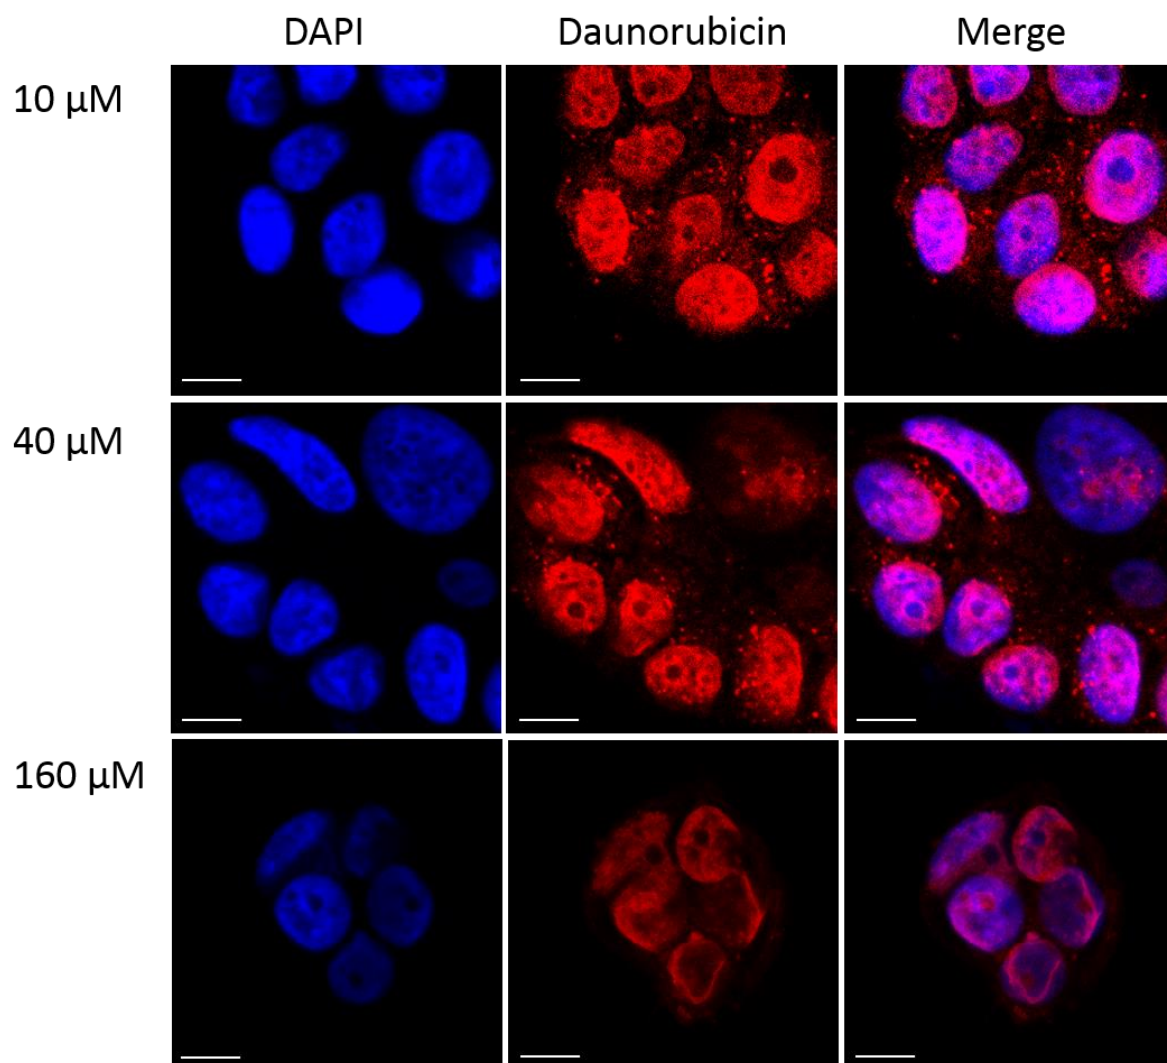

**Figure S10.** Cellular uptake of bioconjugate **1** (10  $\mu\text{M}$ , 40  $\mu\text{M}$  and 160  $\mu\text{M}$ ) visualized by confocal laser scanning microscopy (CLSM) (scale bars represent 10  $\mu\text{m}$ ).

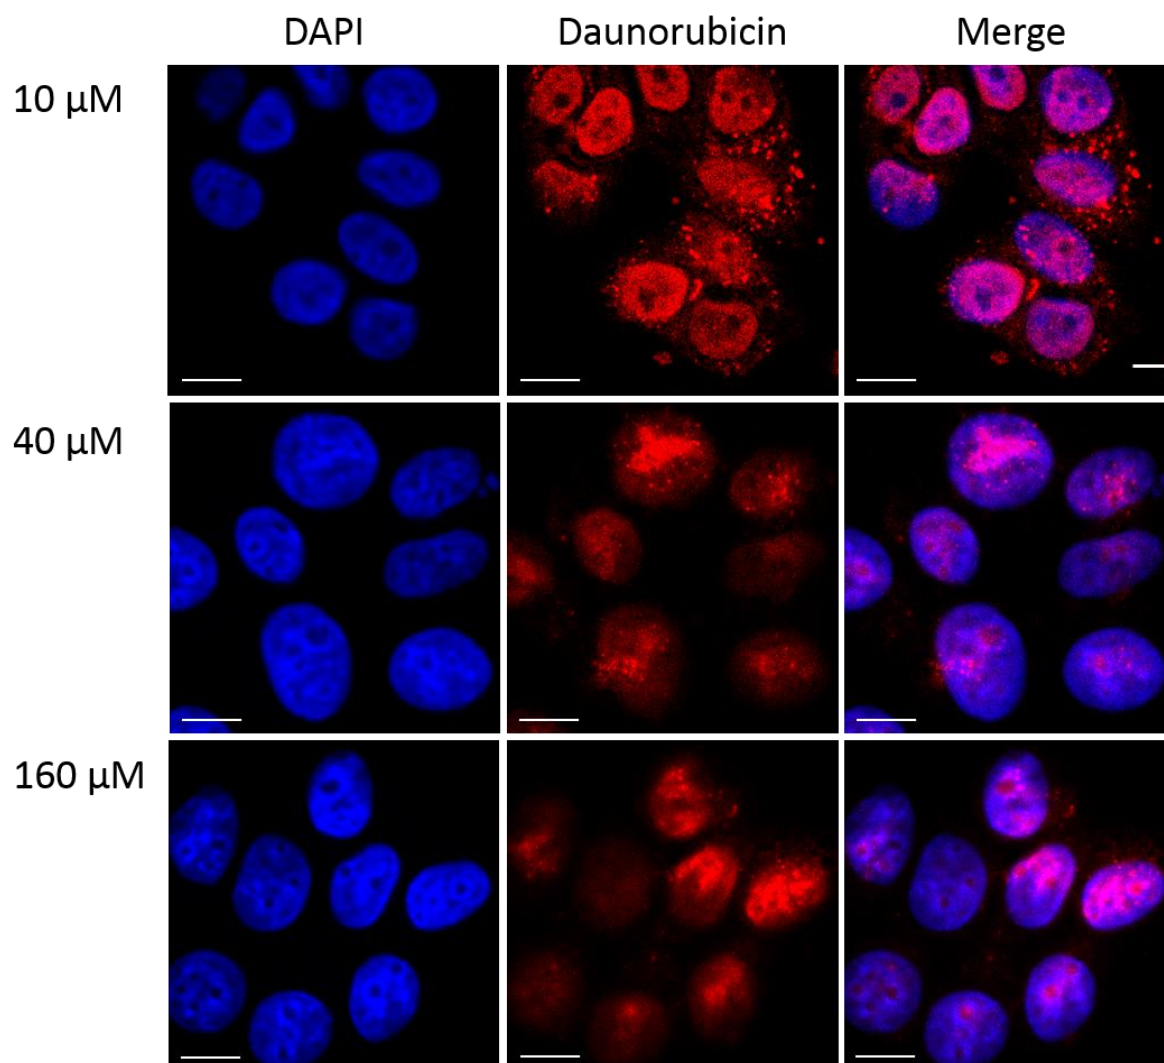

**Figure S11.** Cellular uptake of bioconjugate **2** (10  $\mu\text{M}$ , 40  $\mu\text{M}$  and 160  $\mu\text{M}$ ) visualized by confocal laser scanning microscopy (CLSM) (scale bars represent 10  $\mu\text{m}$ ).

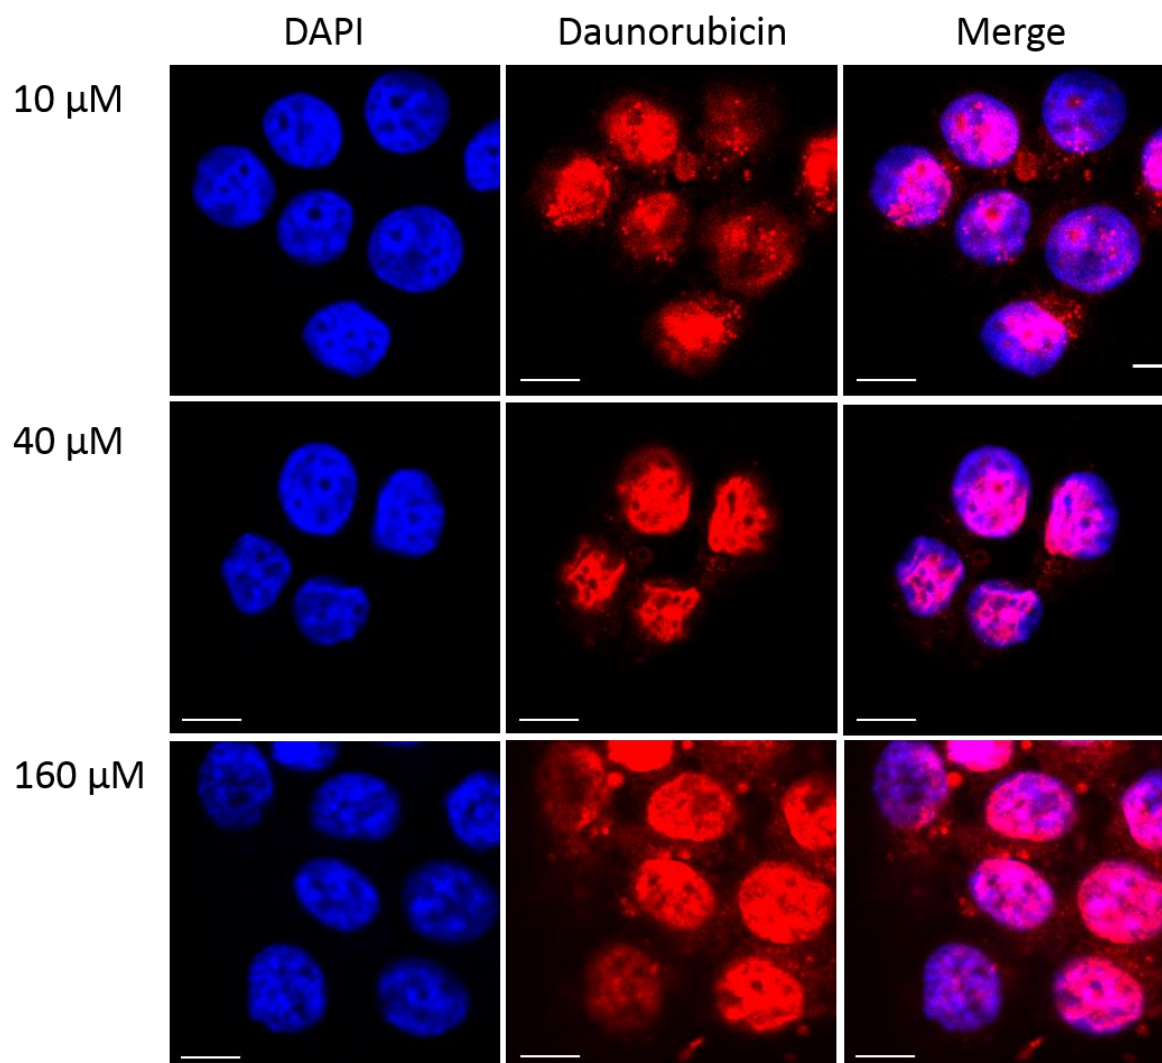

**Figure S12.** Cellular uptake of bioconjugate **K2** (10  $\mu$ M, 40  $\mu$ M and 160  $\mu$ M) visualized by confocal laser scanning microscopy (CLSM) (scale bars represent 10  $\mu$ m).

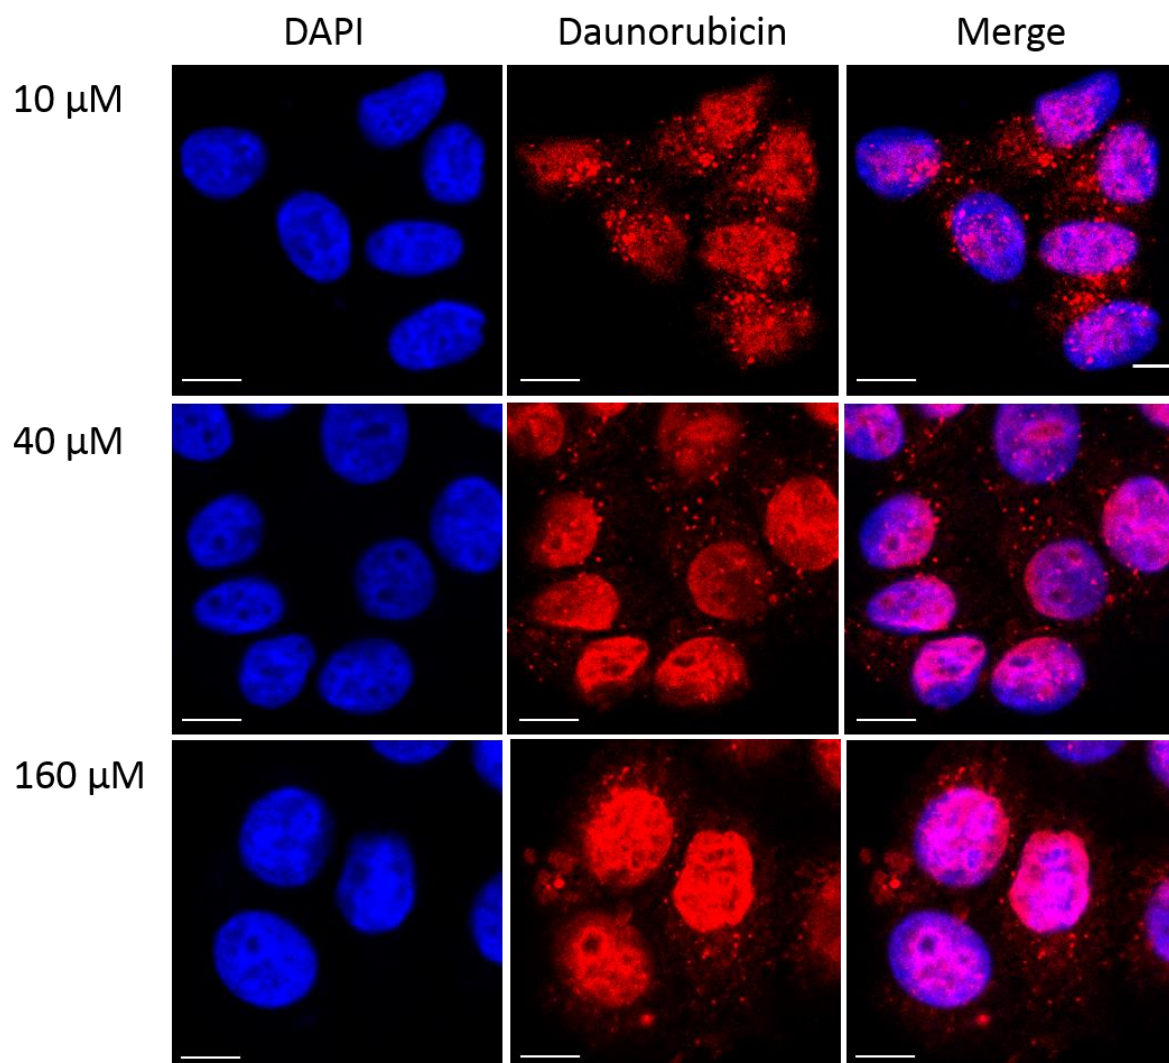

**Figure S13.** Cellular uptake of bioconjugate **4** (10  $\mu\text{M}$ , 40  $\mu\text{M}$  and 160  $\mu\text{M}$ ) visualized by confocal laser scanning microscopy (CLSM) (scale bars represent 10  $\mu\text{m}$ ).

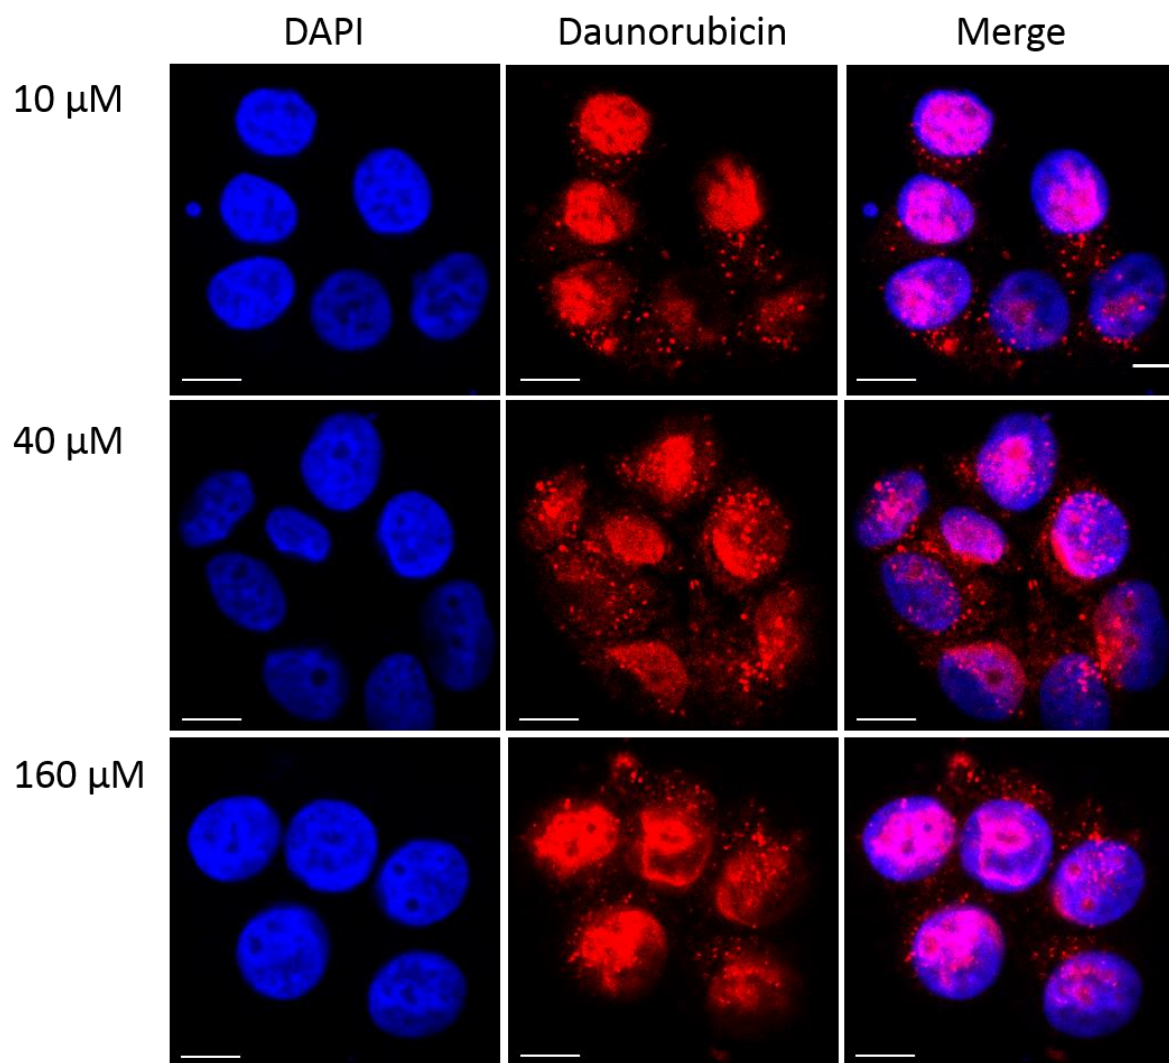

**Figure S14.** Cellular uptake of bioconjugate **5** (10  $\mu\text{M}$ , 40  $\mu\text{M}$  and 160  $\mu\text{M}$ ) visualized by confocal laser scanning microscopy (CLSM) (scale bars represent 10  $\mu\text{m}$ ).

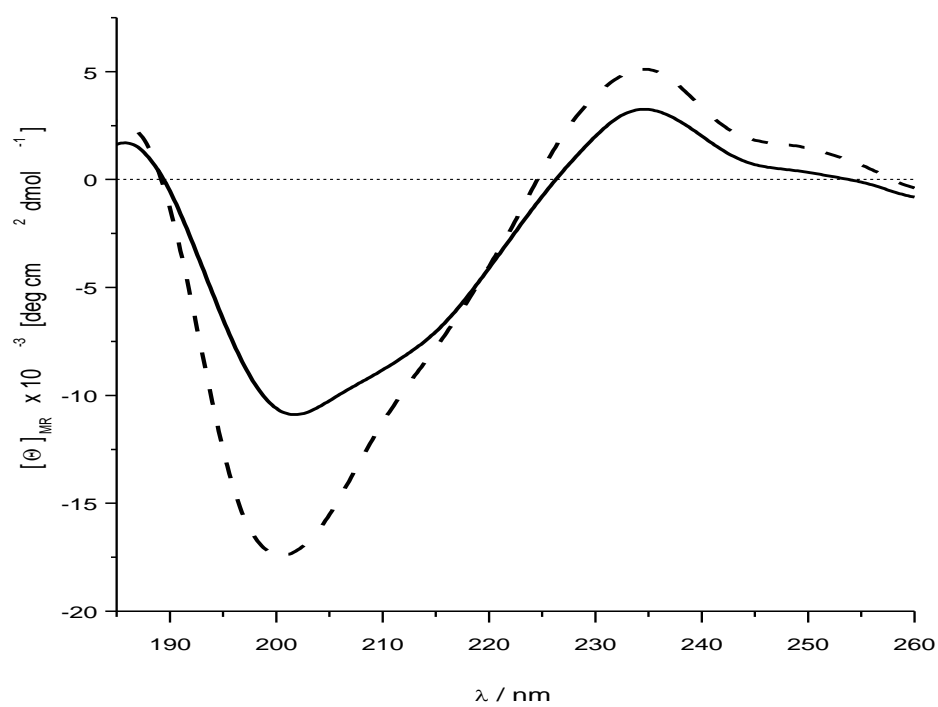

**Figure S15.** Far-UV ECD spectra of **K1** (dash) and **1** (solid) in water.

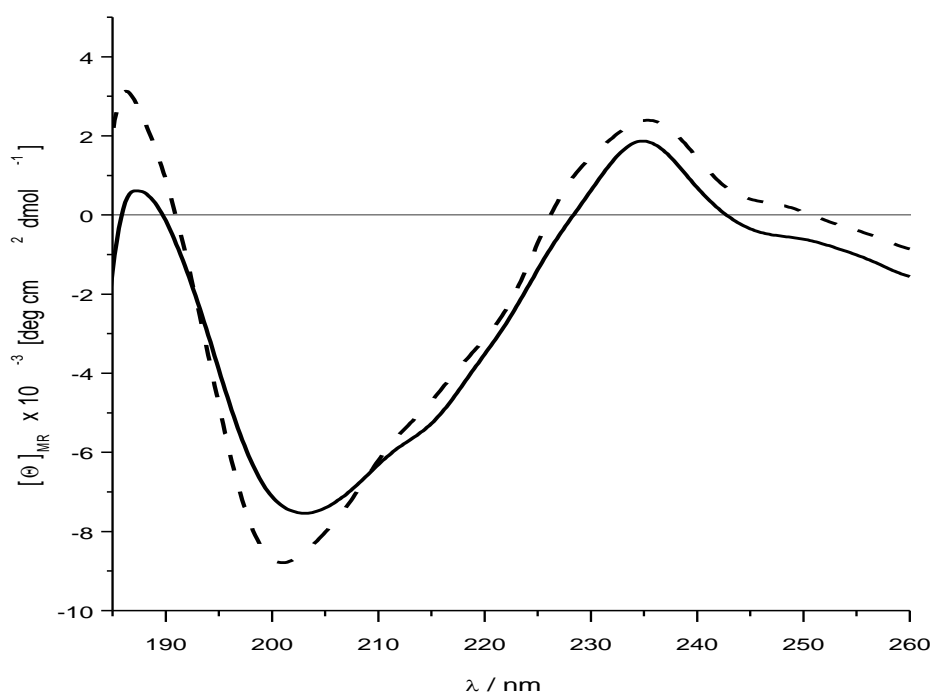

**Figure S16.** Far-UV ECD spectra of **K2** (dash) and **4** (solid) in water.
